# Supplementary material
Source: HighWire-hosted journal article supplement (https://hw-f5-jim.highwire.org/content/jim-2020-001410)

**Supplementary Figure 1. Calibration of the ability of CFS to predict time to discharge from hospital**

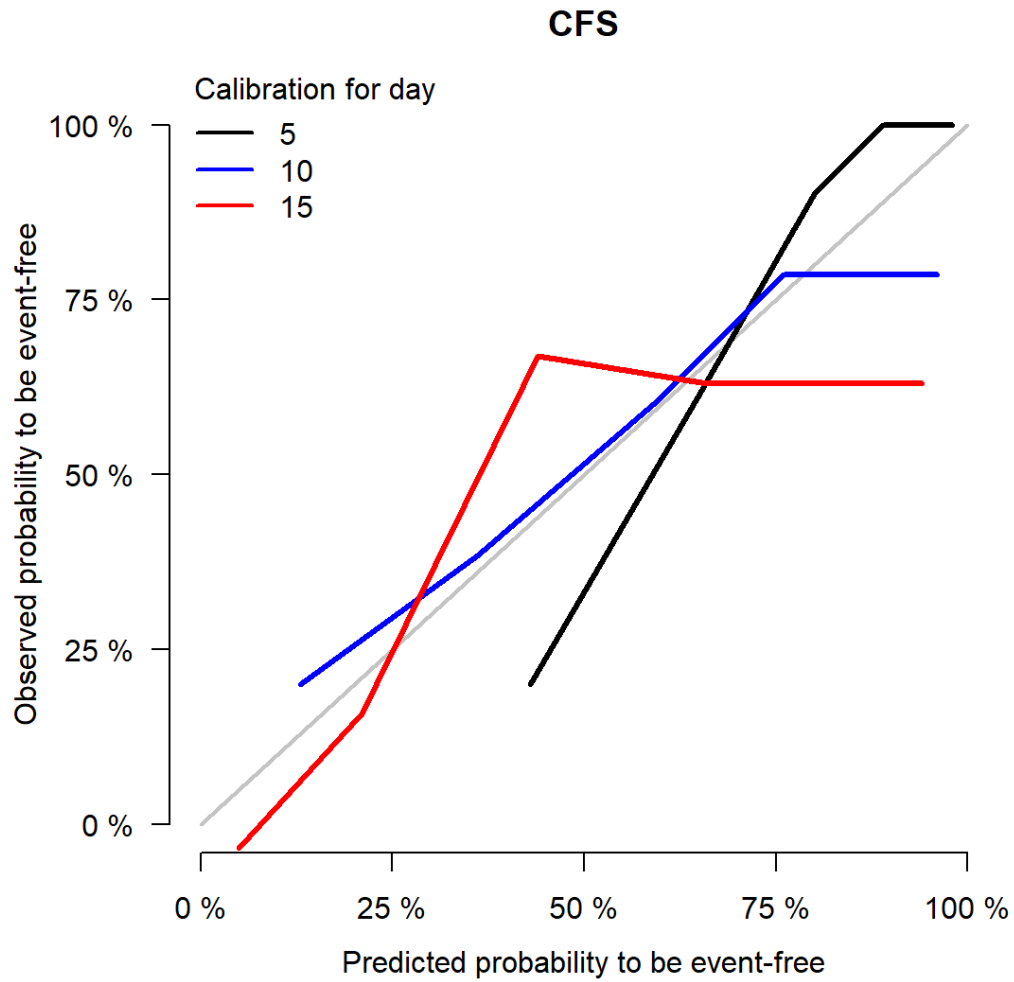

**Supplementary Figure 2. Calibration of the ability of CFS to predict need for mechanical ventilation**

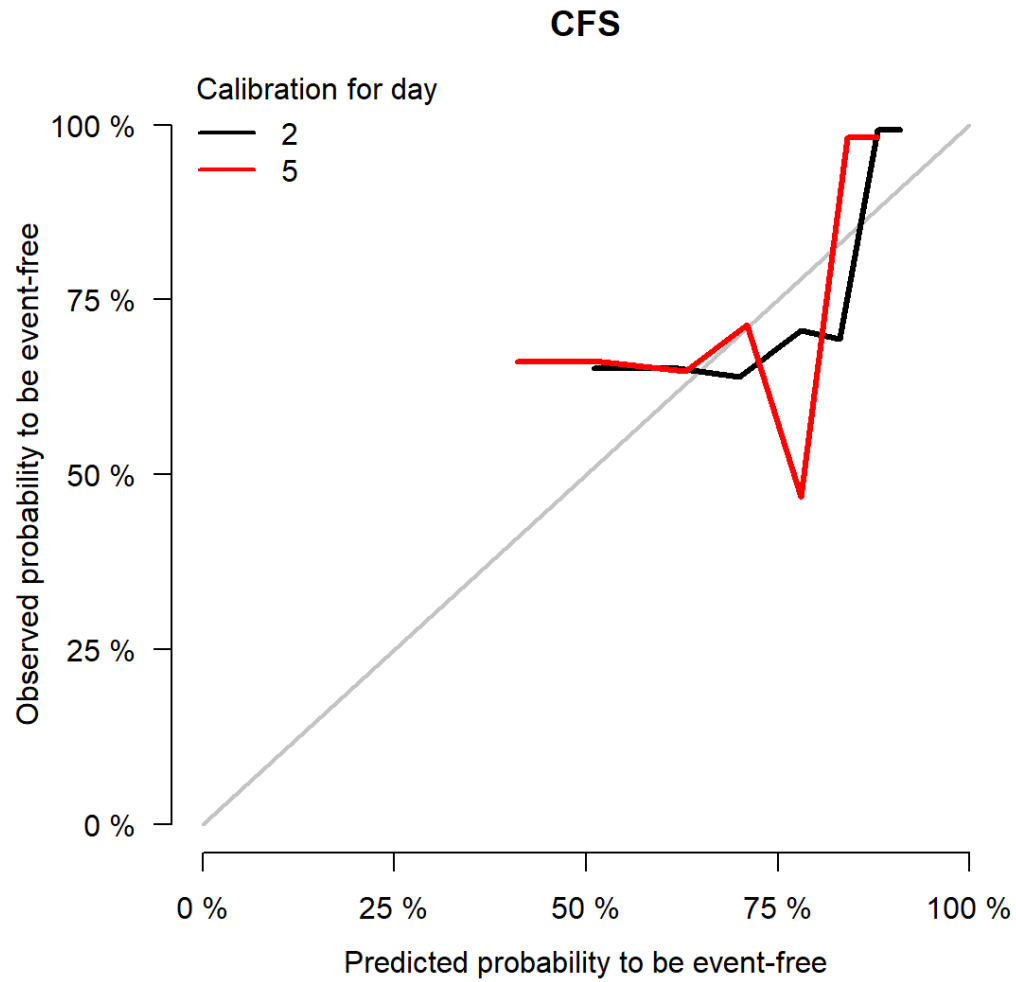

Supplement: inline-supplementary-material-1 [file inline-supplementary-material-1.pdf]
